# Supplementary material
Source: PubMed Central journal article supplement (PMC6207211)

## SUPPLEMENTAL MATERIAL

Supplemental Figure I. Lp(a) distributions in A) Black; B) Caucasian; C) Chinese-American; and D) Hispanic MESA participants.

**A**

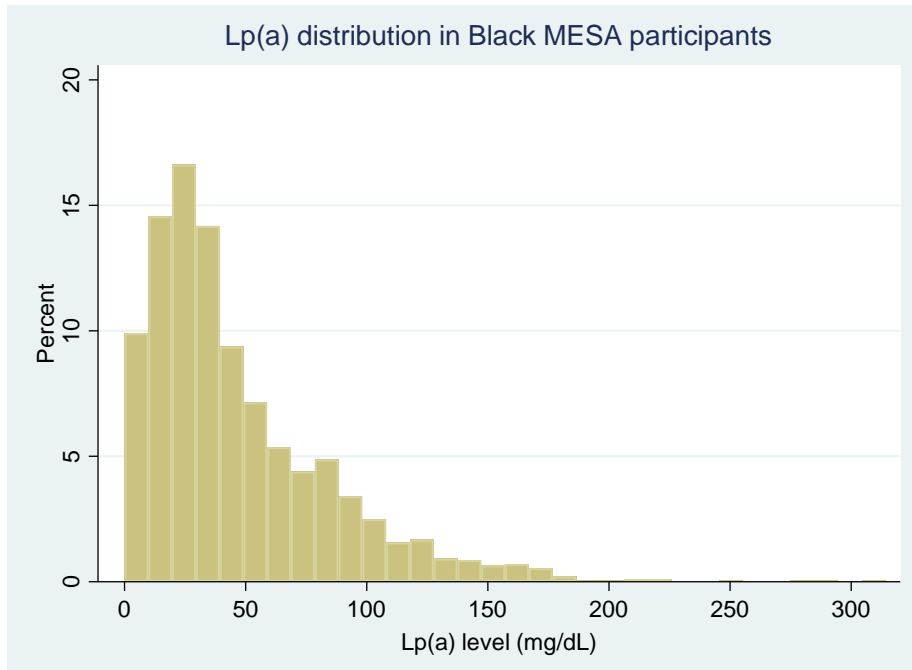

**B**

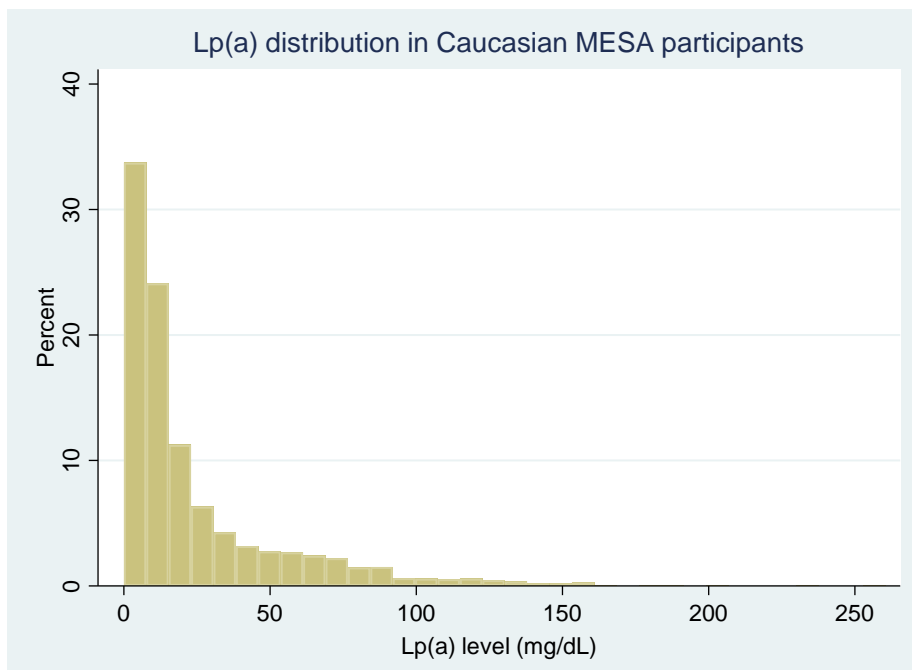

**C**

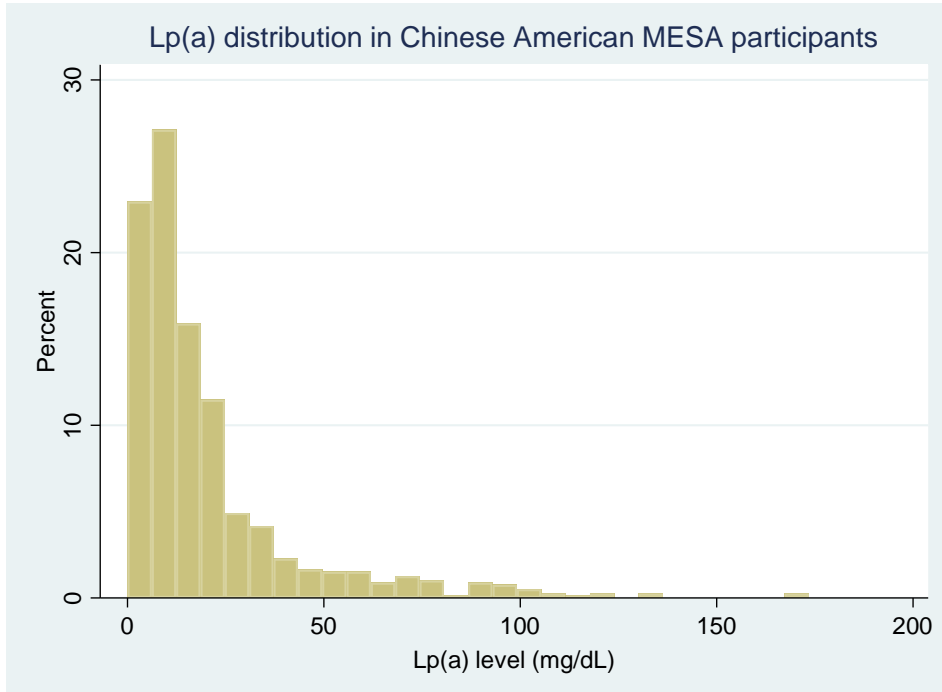

**D**

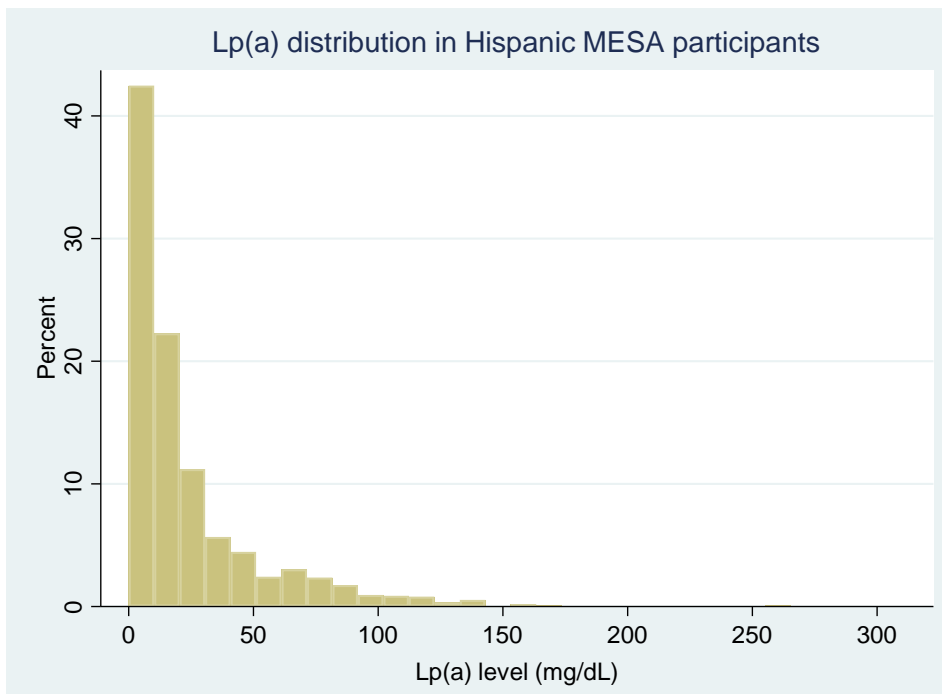

Supplemental Figure II (panels A-D). Nelson-Aalen cumulative hazards of incident heart failure for: A) Caucasian; B) Black; C) Chinese-American; and D) Hispanic MESA participants dichotomized by the 30 mg/dL Lp(a) cutoff value.

**A**

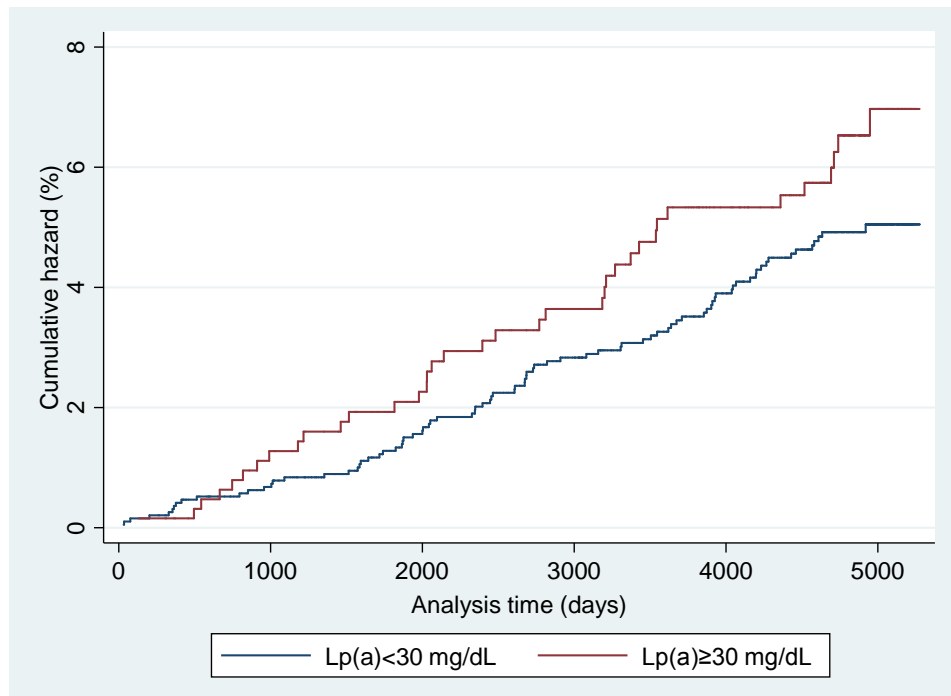

**B**

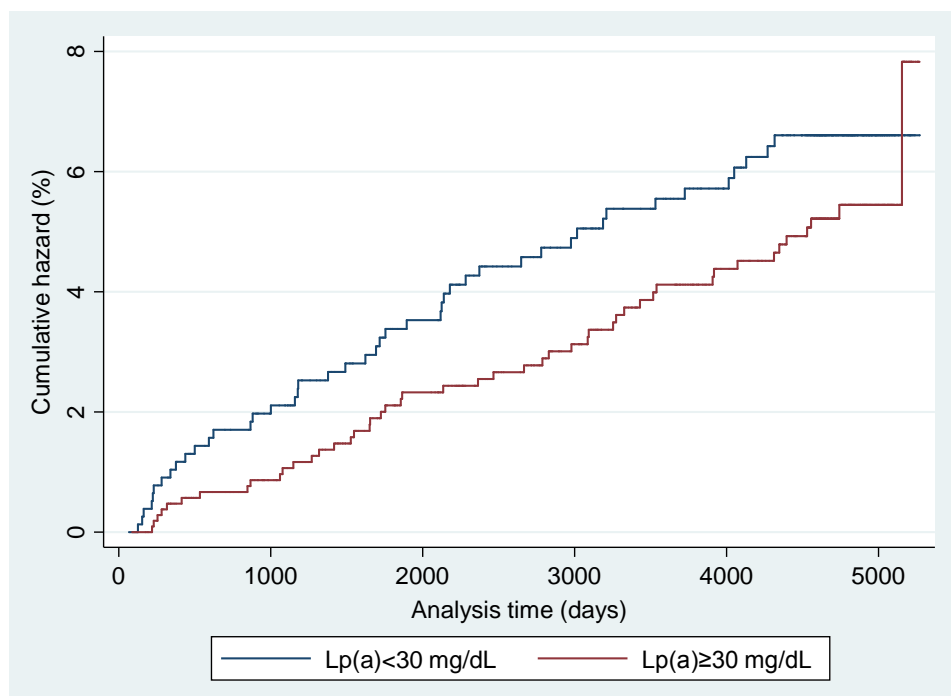

C

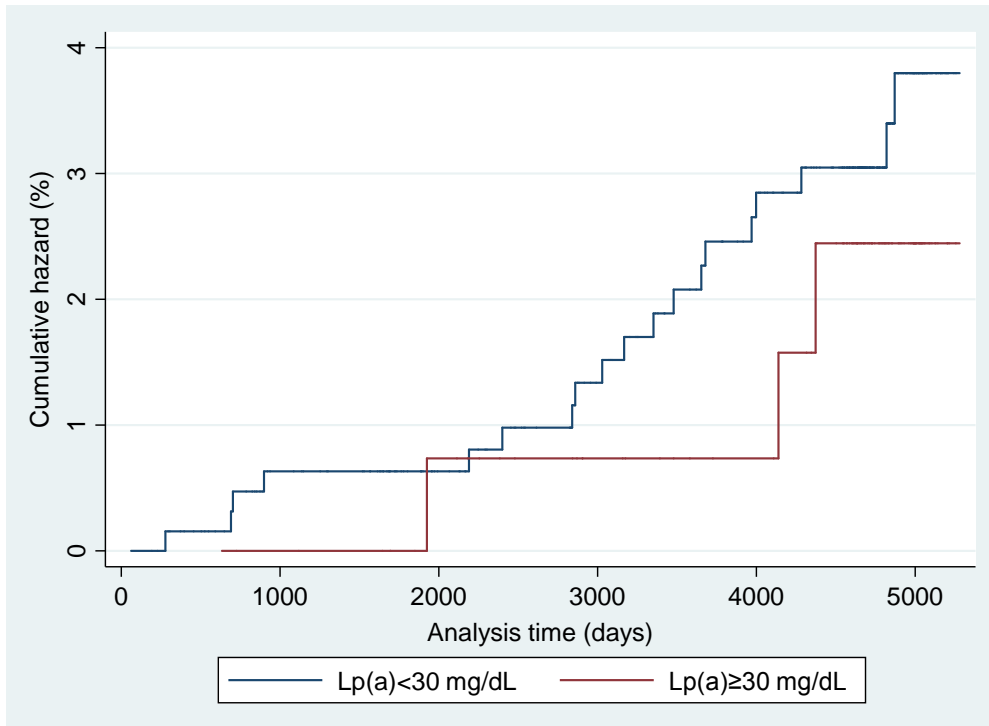

D

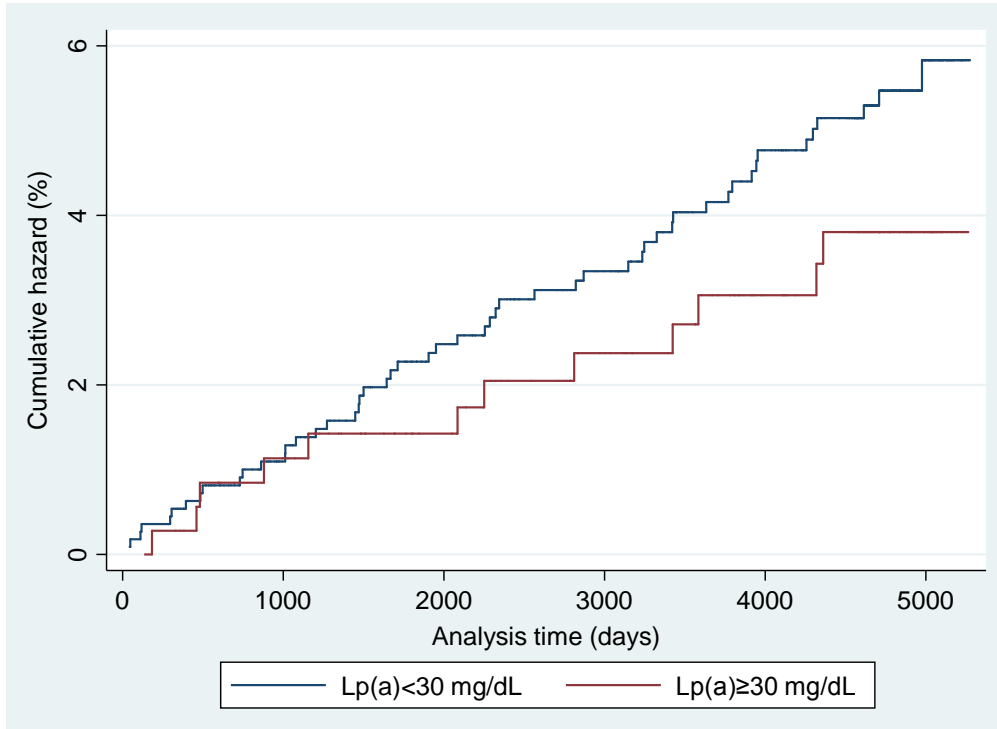

Supplement: NIHMS1503642-supplement-Supplemental_Digital_Content.pdf [file NIHMS1503642-supplement-Supplemental_Digital_Content.pdf]
